# Supplementary material
Source: PubMed Central journal article supplement (PMC4752389)
Supplement: NIHMS745024-supplement-Supp_Fig_S1.pdf [file NIHMS745024-supplement-Supp_Fig_S1.pdf]

**SUPPORTING INFORMATION FOR THE ARTICLE:**

**Long-read single-molecule real-time (SMRT) full gene sequencing of cytochrome P450-2D6 (CYP2D6)**

Wanqiong Qiao<sup>1\*</sup>, Yao Yang<sup>1\*</sup>, Robert Sebra<sup>1,2</sup>, Geetu Mendiratta<sup>1</sup>, Andrea Gaedigk<sup>3,4</sup>, Robert J. Desnick<sup>1</sup>, and Stuart A. Scott<sup>1</sup>

\* These authors contributed equally to this manuscript and should be regarded as joint first authors.

<sup>1</sup> Department of Genetics and Genomic Sciences, Icahn School of Medicine at Mount Sinai, New York, NY 10029, USA.

<sup>2</sup> Icahn Institute for Genomics and Multiscale Biology, Icahn School of Medicine at Mount Sinai, New York, NY 10029, USA.

<sup>3</sup> Division of Clinical Pharmacology, Toxicology & Therapeutic Innovation, Children's Mercy Kansas City, Kansas City, MO 64108, USA.

<sup>4</sup> School of Medicine, University of Missouri-Kansas City, Kansas City, MO 64108, USA.

**CORRESPONDENCE TO:**

**Stuart A. Scott, PhD**

Assistant Professor

Department of Genetics and Genomic Sciences

Icahn School of Medicine at Mount Sinai

One Gustave L. Levy Place, Box 1497

New York, NY, 10029

Tel. 212-241-3780

Fax. 212-241-1464

E-mail: [stuart.scott@mssm.edu](mailto:stuart.scott@mssm.edu)

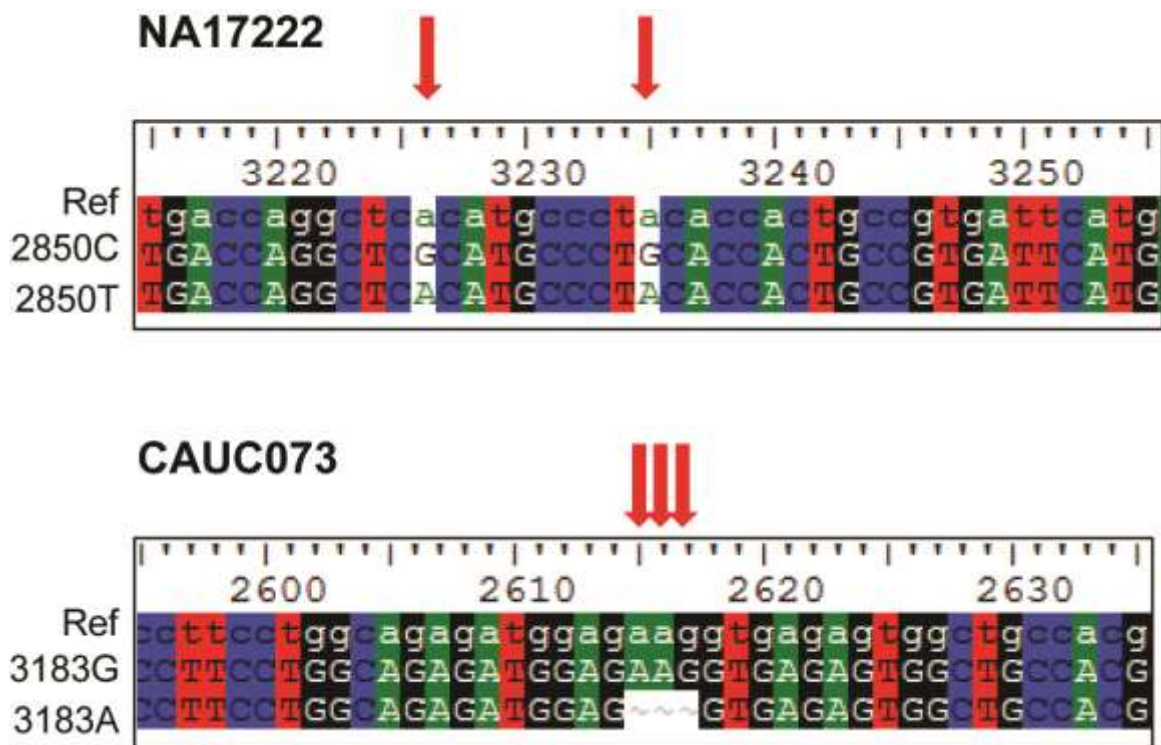

**Supp. Figure S1.** Allele-specific PCR and Sanger sequencing results of NA17222 and CAUC073 based on 2850C>T and 3183G>A, respectively. Red arrows denote the locations of interrogated variants by Sanger sequencing. The 3226A>G (rs61736517; p.H352R) and 3235A>G (rs202102799; p.Y355C) variants detected in NA17222 by *CYP2D6* SMRT sequencing were found in *cis* with 2850C (classified as \*108), and the 3183G>A (rs59421388; p.V338M) variant detected in CAUC073 was on the same haplotype as the 2615\_2617delAAG (rs5030656; p.K281del) allele (classified as \*109).

**Supp. Tables S1-S5** are available in a separate Excel file under the Supporting Information for this article.

**Supp. Table S1.** *CYP2D6* variant coordinates according to common M33388.1 GenBank reference and HGVS nomenclature

**Supp. Table S2.** *CYP2D6* variants and diplotypes identified by SMRT sequencing in the positive control samples

**Supp. Table S3.** *CYP2D6* Allele-specific PCR (AS-PCR) results and phased diplotype determination for NA17222 and CAUC073

**Supp. Table S4.** *CYP2D6* variants and diplotypes identified by SMRT sequencing in the duplication control samples

**Supp. Table S5.** *CYP2D6* variants and diplotypes identified by SMRT sequencing in the discordant control samples
